# Supplementary material for: Growth of polyoxomolybdate with a porous pyramidal structure on carbon xerogel nanodiamond as an efficient electro-catalyst for oxygen reduction reaction
Source: Royal Society of Chemistry journal article supplement (doi:10.1039/d2ra07543a), 2023-01-01
Supplement: d2ra07543a1.pdf [file d2ra07543a1.pdf]

### Supplementary Materials

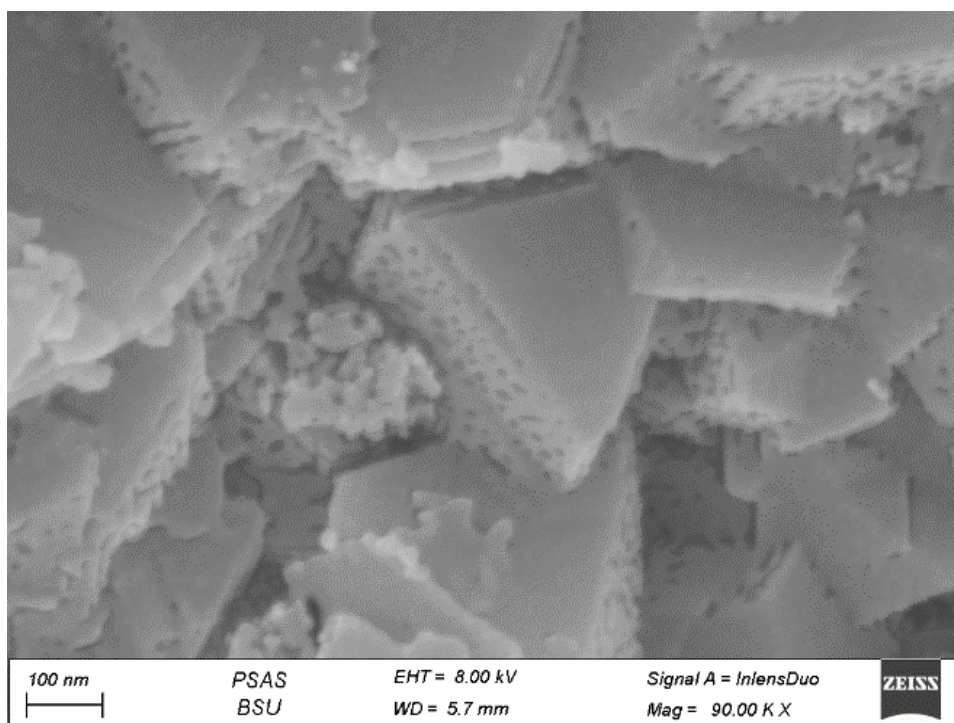

Figure S1: FESEM image for POM@CDNPs where the porous structure of the POM pyramidal shapes is shown.

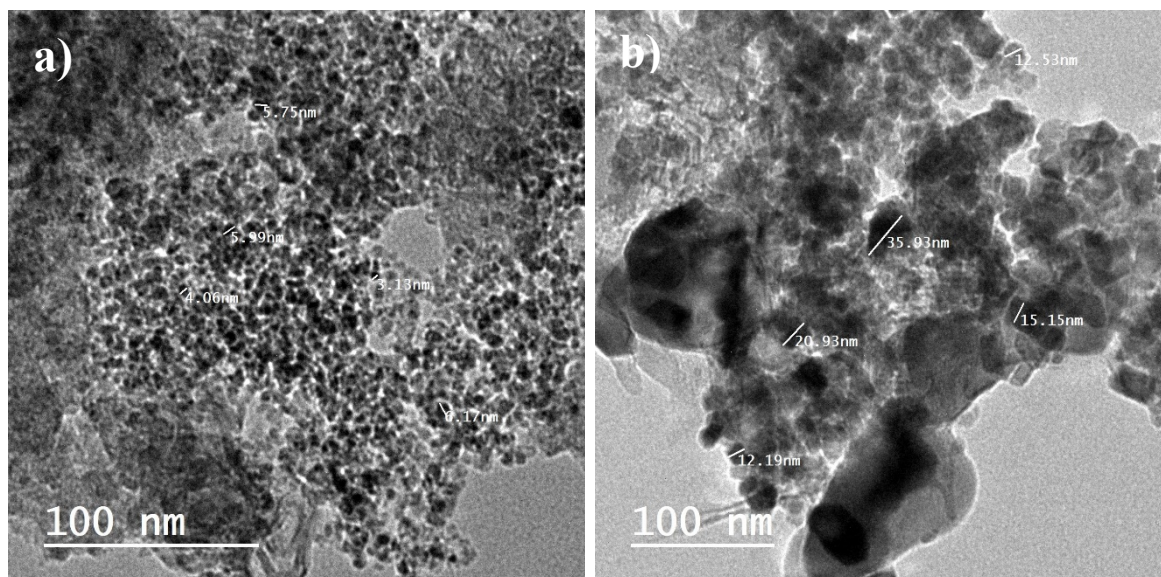

Figure S2: HRTEM images for (a) CDNPs and (b) POM@CDNPs.

## Supplementary Materials

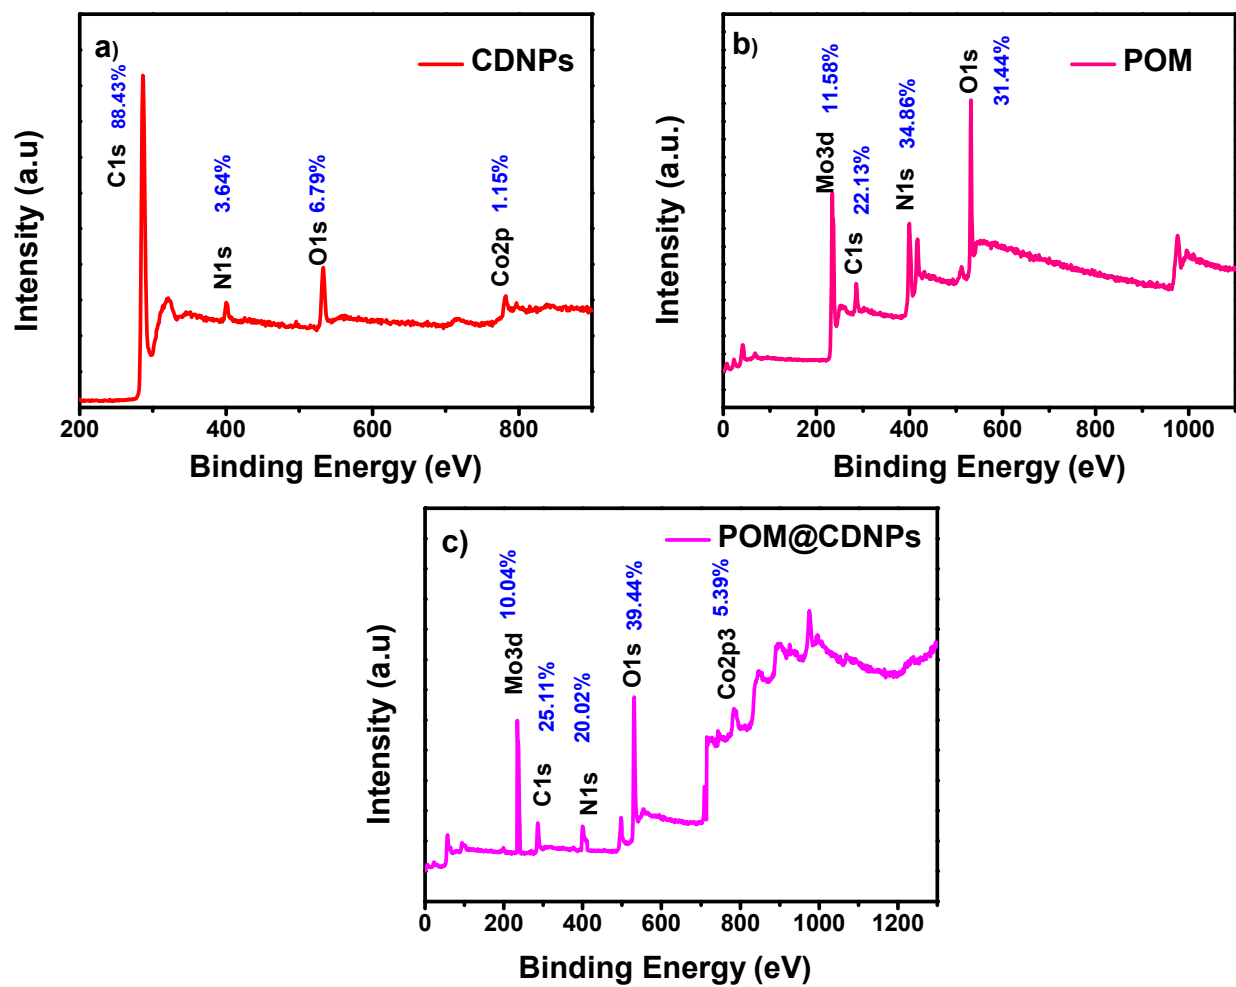

Figure S3: XPS survey spectrum of the CDNPs, POM and POM@CDNPs.

### Supplementary Materials

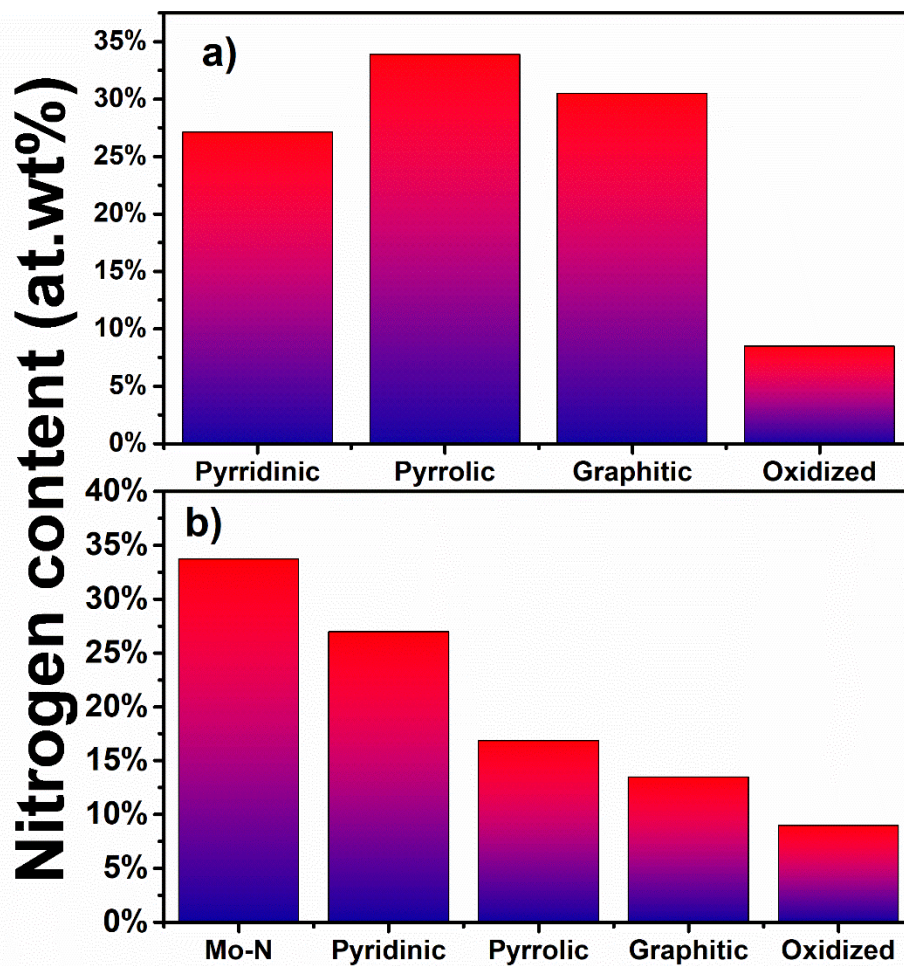

Figure S4: The contents of different types of nitrogen in the a) CDNPs and b) POM@CDNPs.

## Supplementary Materials

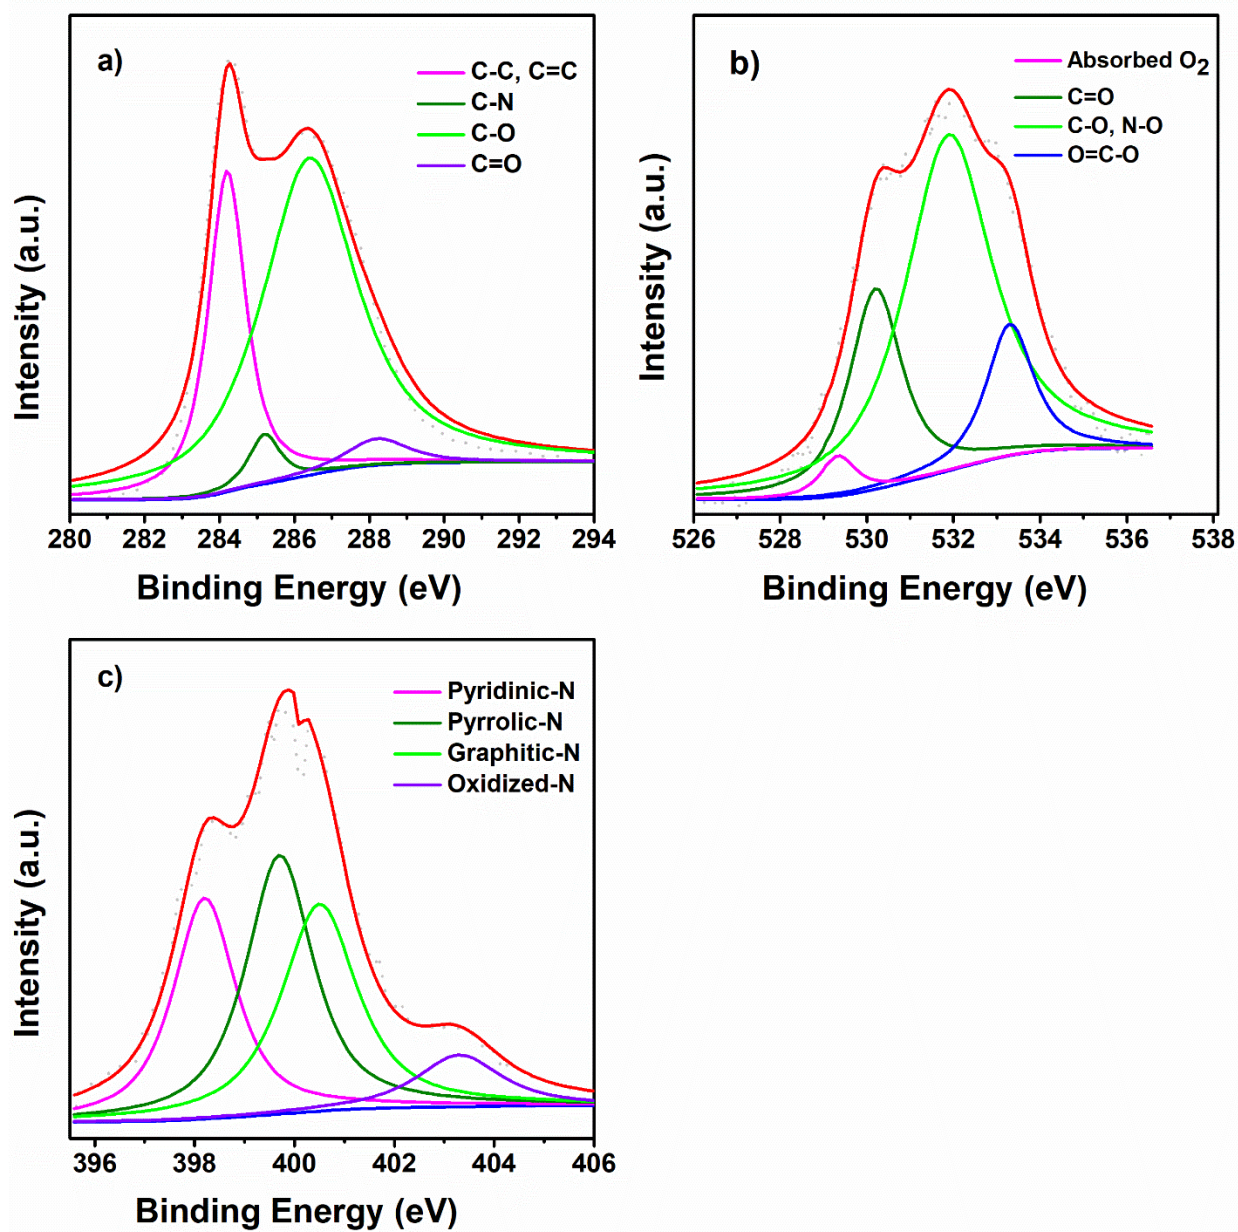

Figure S5: High-resolution (a) C 1s, (b) O 1s, and (c) N 1s, spectra of CDNPs.

## Supplementary Materials

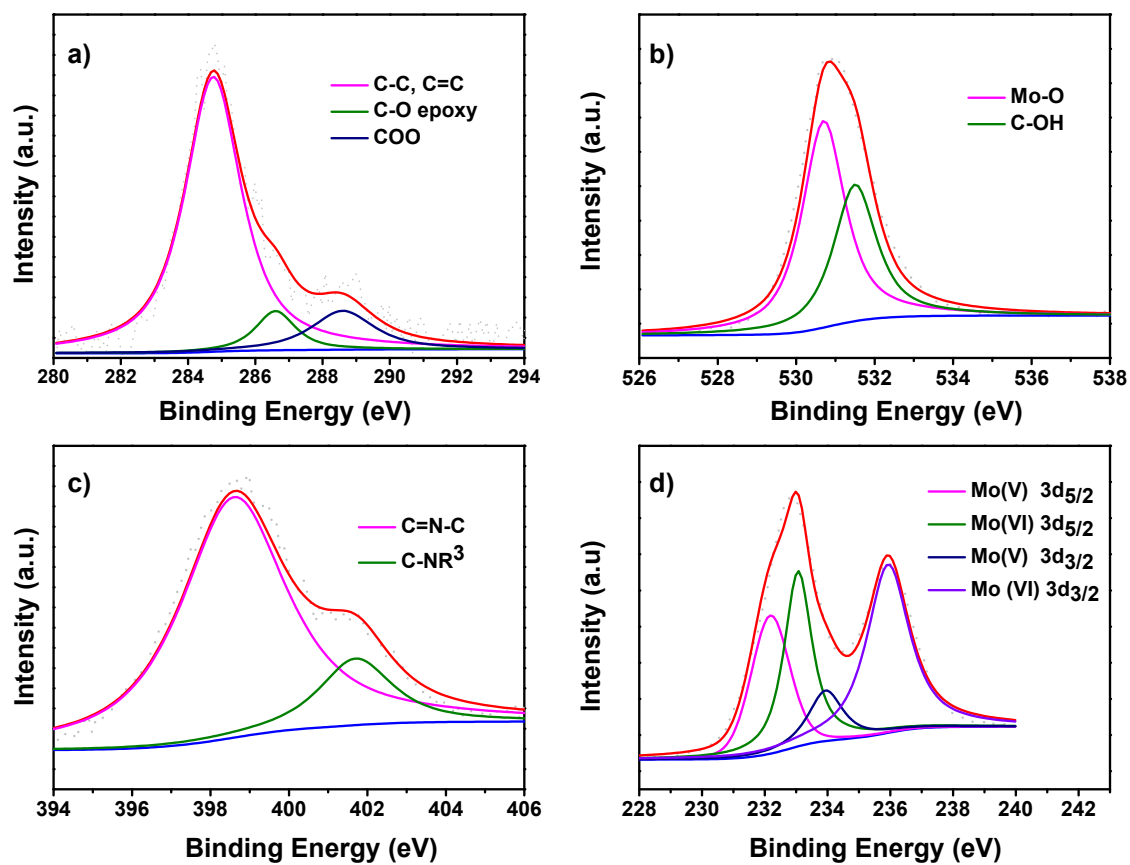

Figure S6: High-resolution (a) C 1s, (b) O 1s, (c) N 1s, and Mo 3d spectra of POM.
